# Supplementary material
Source: PubMed Central journal article supplement (PMC3250992)
Supplement: NIHMS338805-supplement-Supplement1.pdf [file NIHMS338805-supplement-Supplement1.pdf]

## Supplementary Appendix

This appendix has been provided by the authors to give readers additional information about their work.

Supplement to: Kimberlin DW, Whitley RJ, Wan W, et al. Oral acyclovir suppression and neurodevelopment after neonatal herpes. *N Engl J Med* 2011;365:1284-92.

## TABLE OF CONTENTS

|                                                                                                                                                               |           |
|---------------------------------------------------------------------------------------------------------------------------------------------------------------|-----------|
| <b>METHODS</b> .....                                                                                                                                          | <b>2</b>  |
| <b>Study Design and Population</b> .....                                                                                                                      | <b>2</b>  |
| <b>Virologic Assessments</b> .....                                                                                                                            | <b>3</b>  |
| <b>Statistical Analyses</b> .....                                                                                                                             | <b>3</b>  |
| <b>RESULTS</b> .....                                                                                                                                          | <b>4</b>  |
| <b>Subject Demographics and Characteristics</b> .....                                                                                                         | <b>4</b>  |
| <b>Cutaneous Recurrences</b> .....                                                                                                                            | <b>5</b>  |
| <b>Safety Assessments</b> .....                                                                                                                               | <b>5</b>  |
| <b>DISCUSSION</b> .....                                                                                                                                       | <b>6</b>  |
| <b>Table 4. Demographics and Clinical Characteristics By Study Drug Assignment</b> .....                                                                      | <b>7</b>  |
| <b>Table 5. Demographics and Clinical Characteristics of Subjects With and Without 12<br/>    Month Bayley Scales of Infant Development Assessments</b> ..... | <b>9</b>  |
| <b>Table 6. Summary of Serious Adverse Events and Possibly/Probably/Related Adverse<br/>    Events</b> .....                                                  | <b>11</b> |
| <b>REFERENCES</b> .....                                                                                                                                       | <b>13</b> |

## **METHODS**

### ***Study Design and Population***

Parallel, identical studies were performed to avoid confounding of outcome. The studies were designed by Drs. Kimberlin and Whitley, and were approved by the ethics boards at all participating centers.

The Bayley Scales of Infant Development is the standard neurodevelopmental tool available for and validated in infants beginning at 12 months of age.

All supplies of active and placebo study medication were labeled centrally, provided to study sites in blinded packaging, and dispensed by site research pharmacists.

Randomization was stratified by study site and blocked within each site.

This duration was selected based upon prior evidence that three or more cutaneous recurrences during the first six months following acute disease correlated with increased risk of neurologic sequelae in patients with SEM disease.<sup>1,2</sup> Compliance with study medication administration was not systematically assessed throughout the lengthy treatment period due to the impracticality and cost of doing so; study results reflect the “real world” challenges and benefits of daily medication administration for prolonged periods of time. With skin recurrences while on blinded study medication, subjects had a lumbar puncture if the sick visit occurred within 12 hours of skin vesicle development. If the CSF indices were reassuring and CSF HSV PCR was negative, the subject was treated with episodic open-label oral acyclovir (80 mg/kg/day administered in

four divided doses) for 5 days, then blinded study drug suppression was resumed. If the subject had a second cutaneous recurrence and therefore met the secondary endpoint, the subject again was evaluated for CNS involvement and received episodic open-label treatment, but blinded study drug suppression was not resumed. Instead, the subject was offered open-label oral acyclovir suppression at the enrolling physician's discretion. If a subject had CNS disease while on blinded study drug, he/she was treated with another 21 day course of intravenous acyclovir, and the blinded medication was not resumed.

### ***Virologic Assessments***

Viral cultures were performed at the study sites. The CSF was tested for HSV DNA by PCR at the CASG Central Laboratory at the University of Alabama at Birmingham.<sup>3</sup>

### ***Statistical Analyses***

The site Principal Investigator and his/her study team gathered the study data, completed the Case Report Forms, and submitted the data to the CASG Central Unit where they were entered into the database.

The assumption of a normal distribution for mental and motor scores was confirmed by the normal probability plot and the Shapiro-Wilks normality test. If a score was not normally distributed ( $P < 0.05$ ), then the Kruskal-Wallis test was used to compare the two groups. For both secondary efficacy analyses,

For the tertiary safety analyses, frequencies of side effects were summarized by grade using frequencies and percentages.

Ms. Cloud led the statistical team, and Dr. Kimberlin led the overall data analysis assessments. Dr. Kimberlin and all coauthors attest to the validity of the data, decided to publish the study results, and wrote all drafts of the study manuscript.

## **RESULTS**

### ***Subject Demographics and Characteristics***

Of the 24 subjects in the CNS study randomized to acyclovir suppression, 15 completed the six months on blinded active medication, 7 completed the six months on open-label active medication, and 2 stopped active drug suppression prior to completing the six months (Figure 1a). Of the 21 subjects in the CNS study randomized to placebo, 8 completed the six months on blinded placebo medication, 9 were switched per protocol to open-label active acyclovir suppression during the six month treatment course, and 4 stopped all study medication prior to completing the six months (Figure 1a).

Of the 15 subjects in the SEM study randomized to acyclovir suppression, 8 completed the six months on blinded active medication, 5 completed the six months on open-label active medication, and 2 stopped active drug suppression prior to completing the six months (Figure 1b). Of the 14 subjects in the SEM study randomized to placebo, 4 completed the six months on blinded placebo medication, 9 were switched per protocol to open-label active acyclovir

suppression during the six month treatment course, and 1 stopped all study medication prior to completing the six months (Figure 1b).

### ***Cutaneous Recurrences***

Two months after beginning blinded study medication, all babies randomized to acyclovir remained on blinded therapy, compared with three-quarters of babies randomized to placebo. By six months after randomization, four-fifths of babies randomized to acyclovir remained on blinded therapy, compared with one-half of babies randomized to placebo.

Cutaneous recurrences appeared as “typical” HSV mucocutaneous lesions, with small clusters of vesicles on erythematous bases.

Cutaneous recurrences occurred both during and following completion of antiviral suppression. By 6 months after study enrollment, 11 (28%) of the 39 subjects randomized to acyclovir and 16 (46%) of the 35 subjects randomized to placebo had experienced two or more skin recurrences. Between 6 and 12 months of life, 4 additional subjects randomized to acyclovir and 3 additional subjects randomized to placebo had experienced a second or subsequent cutaneous recurrence.

### ***Safety Assessments***

No differences between randomization groups were seen for other hematologic (white blood cell count, hemoglobin, hematocrit, and platelets) or chemistry (blood urea nitrogen, creatinine, bilirubin, aspartate aminotransferase, and alanine aminotransferase) laboratory tests, or for adverse events or serious adverse events.

## **DISCUSSION**

The study endpoints were selected because of their high clinical relevance. Improved neurodevelopmental outcome has been a major goal of all therapeutic clinical trials of neonatal herpes for over 30 years.<sup>4-7</sup> Skin recurrences have both clinical implications (pain, psychosocial for child and parents, infectivity to others) and have been correlated with increased risk of poor neurologic outcomes.<sup>1</sup> An earlier small Phase I/II trial implicated neutropenia as possibly being associated with oral acyclovir suppressive therapy following neonatal herpes,<sup>8</sup> so systematic assessment of safety with a grading scale was imperative in these controlled studies.

**Table 1. Demographics and Clinical Characteristics By Study Drug Assignment**

| Study                            | CASG 103          |                 |                                           |                | CASG 104          |                 |
|----------------------------------|-------------------|-----------------|-------------------------------------------|----------------|-------------------|-----------------|
|                                  | CNS Disease       |                 | Disseminated Disease with CNS Involvement |                | SEM Disease       |                 |
| Study Drug Assignment            | Acyclovir<br>N=21 | Placebo<br>N=16 | Acyclovir<br>N=3                          | Placebo<br>N=5 | Acyclovir<br>N=15 | Placebo<br>N=14 |
| Gender (%)                       |                   |                 |                                           |                |                   |                 |
| Male                             | 11 (52)           | 7 (44)          | 3 (100)                                   | 4 (80)         | 10 (67)           | 8 (57)          |
| Female                           | 10 (48)           | 9 (56)          | 0 (0)                                     | 1 (20)         | 5 (33)            | 6 (43)          |
| P-value                          | 0.74              |                 | --                                        |                | 0.71              |                 |
| Race (%)                         |                   |                 |                                           |                |                   |                 |
| Caucasian, not Hispanic          | 18 (86)           | 9 (56)          | 2 (67)                                    | 3 (60)         | 9 (60)            | 9 (64)          |
| African American                 | 2 (10)            | 3 (19)          | 1 (33)                                    | 1 (20)         | 3 (20)            | 4 (29)          |
| Hispanic                         | 1 (5)             | 2 (13)          | 0 (0)                                     | 1 (20)         | 2 (13)            | 0 (0)           |
| Asian or Pacific Islander        | 0 (0)             | 0 (0)           | 0 (0)                                     | 0 (0)          | 0 (0)             | 1 (7)           |
| Native American or Alaskan       | 0 (0)             | 0 (0)           | 0 (0)                                     | 0 (0)          | 0 (0)             | 0 (0)           |
| Other                            | 0 (0)             | 2 (13)          | 0 (0)                                     | 0 (0)          | 1 (7)             | 0 (0)           |
| P-value                          | 0.19              |                 | --                                        |                | 0.58              |                 |
| Birth Weight (lbs)               |                   |                 |                                           |                |                   |                 |
| Median                           | 6.4               | 7.5             | 7.8                                       | 6.9            | 7.3               | 7.2             |
| Range                            | 2.0-8.5           | 6.0-9.9         | 6.9-8.6                                   | 6.4-8.5        | 2.4-9.9           | 2.3-9.0         |
| P-value                          | 0.01              |                 | --                                        |                | 0.70              |                 |
| Head Circumference at Birth (in) |                   |                 |                                           |                |                   |                 |
| Median                           | 12.8              | 13.5            | 13.5                                      | 13.4           | 13.4              | 13.6            |
| Range                            | 9.3-14.2          | 12.2-15.2       | 13.2-13.8                                 | 13.4-13.4      | 9.6-15.0          | 10.0-14.8       |
| P-value                          | 0.03              |                 | --                                        |                | 0.64              |                 |
| Gestational Age (wks)            |                   |                 |                                           |                |                   |                 |
| Median                           | 37                | 38              | 40                                        | 39             | 38                | 39              |
| Range                            | 25-41             | 35-40           | 40-41                                     | 38-40          | 27-40             | 27-41           |
| P-value                          | 0.43              |                 | --                                        |                | 0.30              |                 |
| Enrollment Weight (lbs)          |                   |                 |                                           |                |                   |                 |
| Median                           | 7.4               | 8.7             | 8.6                                       | 8.3            | 7.2               | 8.4             |
| Range                            | 1.9-10.0          | 5.6-10.3        | 7.3-10.2                                  | 7.2-8.9        | 2.3-11.5          | 2.3-10.3        |
| P-value                          | 0.01              |                 | --                                        |                | 0.03              |                 |
| HSV Type (%)                     |                   |                 |                                           |                |                   |                 |



|                                                  |          |          |          |         |           |           |
|--------------------------------------------------|----------|----------|----------|---------|-----------|-----------|
| Type I                                           | 2 (14)   | 3 (27)   | 1 (50)   | 1 (33)  | 5 (42)    | 5 (45)    |
| Type II                                          | 12 (86)  | 8 (73)   | 1 (50)   | 2 (67)  | 7 (58)    | 6 (55)    |
| Unknown                                          | 7        | 5        | 1        | 2       | 3         | 3         |
| P-value                                          | 0.62     |          | 1.00     |         | 1.00      |           |
| CSF WBC at Presentation (cells/mm <sup>3</sup> ) |          |          |          |         |           |           |
| Median                                           | 91.5     | 109.0    | 3.0      | 2.0     | 4.0       | 6.0       |
| Range                                            | 10-1216  | 5-58,080 | 1-18     | 0-13    | 0-20      | 0-33      |
| P-value                                          | 0.69     |          | --       |         | 0.78      |           |
| CSF Protein at Presentation (mg/dL)              |          |          |          |         |           |           |
| Median                                           | 127.5    | 121.0    | 84.0     | 54.0    | 91.0      | 89.0      |
| Range                                            | 69-307   | 51-310   | 49-272   | 47-91   | 43-116    | 39-169    |
| P-value                                          | 0.58     |          | --       |         | 0.58      |           |
| CSF PCR at Presentation                          |          |          |          |         |           |           |
| Positive (%)                                     | 17 (81%) | 12 (75%) | 2 (67%)  | 3 (60%) | 0 (0%)    | 0 (0%)    |
| Negative (%)                                     | 4 (19%)  | 4 (25%)  | 1 (33%)  | 2 (40%) | 14 (100%) | 13 (100%) |
| P-value                                          | 0.70     |          | --       |         | --        |           |
| MRI Evidence of HSV Disease                      | 10 (63%) | 9 (64%)  | 1 (33%)  | 0 (0%)  | 0 (0%)    | 0 (0%)    |
| P-value                                          | 1.00     |          | --       |         | --        |           |
| Abnormal EEG                                     | 9 (69%)  | 10 (71%) | 1 (100%) | 0 (0)   | N/A       | N/A       |
| P-value                                          | 1.00     |          | --       |         |           |           |

N/A = not applicable

**Table 2. Demographics and Clinical Characteristics of Subjects With and Without 12 Month Bayley Scales of Infant Development Assessments**

|                                                  | CNS Study      |                   | SEM Study      |                   |
|--------------------------------------------------|----------------|-------------------|----------------|-------------------|
|                                                  | Bayley<br>N=28 | No Bayley<br>N=17 | Bayley<br>N=15 | No Bayley<br>N=14 |
| Gender (%)                                       |                |                   |                |                   |
| Male                                             | 14 (50)        | 11 (65)           | 12 (80)        | 6 (43)            |
| Female                                           | 14 (50)        | 6 (35)            | 3 (20)         | 8 (57)            |
| P-value                                          | 0.37           |                   | 0.12           |                   |
| Race (%)                                         |                |                   |                |                   |
| Caucasian, not Hispanic                          | 20 (71)        | 12 (70)           | 8 (53)         | 10 (71)           |
| African American                                 | 5 (18)         | 2 (12)            | 5 (33)         | 2 (14)            |
| Hispanic                                         | 2 (7)          | 2 (12)            | 0 (0)          | 2 (14)            |
| Asian or Pacific Islander                        | 0 (0)          | 0 (0)             | 1 (7)          | 0 (0)             |
| Native American or Alaskan                       | 0 (0)          | 0 (0)             | 0 (0)          | 0 (0)             |
| Other                                            | 1 (4)          | 1 (6)             | 1 (7)          | 0 (0)             |
| P-value                                          | 0.89           |                   | 0.21           |                   |
| Birth Weight (lbs)                               |                |                   |                |                   |
| Median                                           | 6.7            | 7.4               | 7.0            | 7.4               |
| Range                                            | 2.4-9.2        | 2.0-9.9           | 2.3-9.9        | 2.4-9.0           |
| P-value                                          | 0.33           |                   | 0.43           |                   |
| Head Circumference at Birth (in)                 |                |                   |                |                   |
| Median                                           | 13.3           | 13.0              | 13.6           | 13.4              |
| Range                                            | 9.7-15.2       | 9.3-14.4          | 10.0-15.0      | 9.6-14.8          |
| P-value                                          | 0.67           |                   | 0.42           |                   |
| Gestational Age (wks)                            |                |                   |                |                   |
| Median                                           | 39.5           | 38                | 38             | 39                |
| Range                                            | 28-41          | 25-40             | 27-41          | 27-40             |
| P-value                                          | 0.17           |                   | 0.69           |                   |
| Enrollment Weight (lbs)                          |                |                   |                |                   |
| Median                                           | 7.8            | 8.2               | 7.8            | 7.8               |
| Range                                            | 2.4-10.2       | 1.9-10.3          | 2.3-11.5       | 2.3-10.3          |
| P-value                                          | 0.45           |                   | 0.78           |                   |
| HSV Type (%)                                     |                |                   |                |                   |
| Type I                                           | 7 (37)         | 0 (0)             | 2 (15)         | 8 (80)            |
| Type II                                          | 12 (63)        | 11 (100)          | 11 (85)        | 2 (20)            |
| Unknown                                          | 9              | 6                 | 2              | 4                 |
| P-value                                          | 0.03           |                   | 0.003          |                   |
| CSF WBC at Presentation (cells/mm <sup>3</sup> ) |                |                   |                |                   |

|                                     |          |          |           |           |
|-------------------------------------|----------|----------|-----------|-----------|
| Median                              | 65       | 71       | 6         | 5         |
| Range                               | 1-58,080 | 0-1216   | 0-20      | 2-33      |
| P-value                             | 0.98     |          | 0.48      |           |
| CSF Protein at Presentation (mg/dL) |          |          |           |           |
| Median                              | 121      | 101      | 99        | 73        |
| Range                               | 49-310   | 47-307   | 40-169    | 39-162    |
| P-value                             | 0.74     |          | 0.18      |           |
| CSF PCR at Presentation             |          |          |           |           |
| Positive (%)                        | 19 (68%) | 15 (88%) | 0 (0%)    | 0 (0%)    |
| Negative (%)                        | 9 (32%)  | 2 (12%)  | 15 (100%) | 12 (100%) |
| P-value                             | 0.16     |          | 0.22      |           |
| MRI Evidence of HSV Disease         | 13 (57%) | 7 (54%)  | 0 (0%)    | 0 (0%)    |
| P-value                             | 1.00     |          | --        |           |
| Abnormal EEG                        | 14 (74%) | 6 (50%)  | N/A       | N/A       |
| P-value                             | 0.26     |          |           |           |

N/A = not applicable

**Table 3. Summary of Serious Adverse Events and Possibly/Probably/Related Adverse Events**

|                                                                         | CNS*               |                  | Disseminated*      |                  | SEM*               |                  |
|-------------------------------------------------------------------------|--------------------|------------------|--------------------|------------------|--------------------|------------------|
|                                                                         | Acyclovir<br>N (%) | Placebo<br>N (%) | Acyclovir<br>N (%) | Placebo<br>N (%) | Acyclovir<br>N (%) | Placebo<br>N (%) |
| Discontinuation of Therapy Due to AE                                    | 0 (0)              | 0 (0)            | 0 (0)              | 0 (0)            | 0 (0)              | 0 (0)            |
| Number of Subjects with AE Possibly Related to Study Drug               | 11 (68.7)          | 5 (31.3)         | 1 (50.0)           | 1 (50.0)         | 8 (72.7)           | 3 (27.3)         |
| Number of Adverse Events Possibly Related to Study Drug, by Intensity   |                    |                  |                    |                  |                    |                  |
| Mild                                                                    | 7 (33.3)           | 4 (57.1)         | 0 (0)              | 1 (100.0)        | 6 (46.2)           | 2 (33.3)         |
| Moderate                                                                | 10 (47.6)          | 3 (42.9)         | 1 (100.0)          | 0 (0)            | 5 (38.5)           | 2 (33.3)         |
| Severe                                                                  | 4 (19.0)           | 0 (0)            | 0 (0)              | 0 (0)            | 2 (15.4)           | 2 (33.3)         |
| Number of Adverse Events Possibly Related to Study Drug, By Body System |                    |                  |                    |                  |                    |                  |
| Body as a Whole                                                         | 1                  | 0                | 0                  | 0                | 0                  | 0                |
| Digestive                                                               | 2                  | 1                | 0                  | 0                | 4                  | 0                |
| Hematopoietic                                                           | 16                 | 4                | 1                  | 0                | 7                  | 5                |
| Hepatic/Biliary                                                         | 1                  | 2                | 0                  | 0                | 1                  | 1                |
| Neurologic                                                              | 0                  | 0                | 0                  | 0                | 1                  | 0                |
| Skin                                                                    | 1                  | 0                | 0                  | 1                | 0                  | 0                |
|                                                                         |                    |                  |                    |                  |                    |                  |
| Discontinuation of Therapy Due to SAE                                   | 0 (0)              | 0 (0)            | 0 (0)              | 0 (0)            | 0 (0)              | 0 (0)            |
| Number of Subjects With SAE                                             | 15 (40.5)          | 12 (32.4)        | 2 (25.0)           | 3 (37.5)         | 8 (53.3)           | 5 (35.7)         |
| Number of Subjects with Related SAE                                     | 9 (42.9)           | 4 (25.0)         | 1 (33.3)           | 0 (0.0)          | 3 (20.0)           | 4 (28.6)         |
| Number of SAEs                                                          | 25                 | 23               | 3                  | 4                | 17                 | 10               |
| Number of Serious Adverse Events, by Body System                        |                    |                  |                    |                  |                    |                  |
| Body as a Whole                                                         | 1                  | 3                | 0                  | 1                | 5                  | 1                |
| Digestive                                                               | 5                  | 0                | 0                  | 0                | 3                  | 1                |
| Ear/Nose/Throat                                                         | 2                  | 1                | 0                  | 0                | 2                  | 0                |
| Hematopoietic                                                           | 9                  | 4                | 1                  | 0                | 5                  | 3                |
| Neurologic                                                              | 2                  | 5                | 0                  | 0                | 0                  | 0                |

|             |   |   |   |   |   |   |
|-------------|---|---|---|---|---|---|
| Respiratory | 2 | 1 | 1 | 0 | 1 | 0 |
| Skin        | 4 | 9 | 1 | 3 | 1 | 5 |

\* P-value for all comparisons > 0.05

## REFERENCES

1. Whitley R, Arvin A, Prober C, et al. Predictors of morbidity and mortality in neonates with herpes simplex virus infections. *N Engl J Med* 1991;324(7):450-4.
2. Kimberlin DW. Advances in the treatment of neonatal herpes simplex infections. *Rev Med Virol* 2001;11(3):157-63.
3. Kimberlin DW, Lakeman FD, Arvin AM, et al. Application of the polymerase chain reaction to the diagnosis and management of neonatal herpes simplex virus disease. *J Infect Dis* 1996;174(6):1162-7.
4. Whitley RJ, Nahmias AJ, Soong SJ, Galasso GG, Fleming CL, Alford CA. Vidarabine therapy of neonatal herpes simplex virus infection. *Pediatrics* 1980;66(4):495-501.
5. Whitley RJ, Yeager A, Kartus P, et al. Neonatal herpes simplex virus infection: follow-up evaluation of vidarabine therapy. *Pediatrics* 1983;72(6):778-85.
6. Whitley R, Arvin A, Prober C, et al. A controlled trial comparing vidarabine with acyclovir in neonatal herpes simplex virus infection. *N Engl J Med* 1991;324(7):444-9.
7. Kimberlin DW, Lin CY, Jacobs RF, et al. Safety and efficacy of high-dose intravenous acyclovir in the management of neonatal herpes simplex virus infections. *Pediatrics* 2001;108(2):230-8.
8. Kimberlin D, Powell D, Gruber W, et al. Administration of oral acyclovir suppressive therapy after neonatal herpes simplex virus disease limited to the skin, eyes and mouth: results of a phase I/II trial. *Pediatr Infect Dis J* 1996;15(3):247-54.
